# Supplementary material
Source: publisher figshare collection journal article supplement (https://frontiersin.figshare.com/ndownloader/files/31070608)
Supplement: Supplementary file 1 [file 31070608]

## Sheet: ST3
Supplemental Table 4. Alleles specific for each of the turkey processing Plants A-D and absent from strains of the same sequence types (STs) from other sources. The analysis involved whole genome MLST genome comparisons of FPE strains from Plants A-D and ST3, CC5, ST6, ST9 and ST321, following exclusion of incomplete or missing alleles from the genomes. Strain names are listed in row 3 and are co…
ST3
Locus	Product	L0607 (B)	L0708 (B)	SK27 (C)	F1046	F4233	F4592	G6003	G6006	G6083	H0462	N1-011A	PNUSAL000341	PNUSAL000752	PNUSAL001371	PNUSAL002547	2017L-6012	PNUSAL002980	PNUSAL002869	PNUSAL004066
Plant B Specific Alleles
lmo0331		new#6	new#6	new#1	new#1	new#1	new#3	new#1	new#1	new#4	new#5	new#1	new#2	new#1	new#1	new#1	new#1	new#1	new#1	new#1
lmo0637	hypothetical protein	new#4	new#4	3	3	3	new#1	3	3	new#2	new#3	3	3	3	3	3	3	3	3	3
lmo1022	two-component response regulator	new#4	new#4	3	3	3	new#1	3	3	new#2	new#3	3	3	3	3	3	3	3	3	3
lmo1235		new#1	new#1	4	4	4	4	I	4	4	4	4	4	4	4	4	4	4	4	4
lmo1401	hypothetical protein	new#4	new#4	2	2	2	new#1	2	2	new#2	new#3	2	2	2	2	2	2	2	2	2
lmo1557	glutamyl-tRNA reductase	new#4	new#4	3	3	3	new#1	3	3	new#2	new#3	3	3	3	3	3	3	3	3	3
lmo2015	alpha-mannosidase	new#5	new#5	3	3	3	new#2	3	3	new#3	new#4	3	new#1	3	3	3	3	3	3	3
Plant C Specific Alleles
LMOSLCC2482_0307	Hypothetical protein	1	1	new#1	I	1	1	1	1	1	new#2	1	1	1	I	2	1	1	1	I
LMOf2365_2341		3	3	new#1	3	3	3	3	3	3	3	3	3	3	3	3	3	3	3	3
folP		21	21	new#1	21	21	21	21	21	21	21	21	21	21	21	21	21	21	21	21
inlJ		165	165	new#1	165	165	new#3	165	165	165	new#4	165	new#2	165	165	165	165	165	165	165
lmo0328		new#3	new#3	new#1	new#3	new#3	new#4	new#3	new#3	new#5	new#6	new#3	new#2	new#3	new#3	new#3	new#3	new#3	new#3	new#3
lmo0371	GntR family transcriptional regulator	14	14	119	3	3	new#2	3	3	new#3	new#4	14	new#1	3	229	3	14	14	14	3
lmo0441		20	20	new#1	20	20	new#3	20	20	new#4	new#5	20	new#2	20	20	20	20	20	20	20
lmo0508		15	15	new#1	15	3	3	3	3	3	3	15	3	3	3	3	15	15	15	3
lmo0530	hypothetical protein	3	3	new#1	3	90	new#2	3	3	new#3	new#4	3	90	3	3	3	3	3	3	3
lmo0541		2	2	new#1	2	2	2	2	2	2	2	new#2	2	2	2	2	2	2	2	2
lmo0674		16	16	new#1	11	11	11	11	11	11	11	16	11	11	11	11	16	16	16	11
lmo0706	flagellar hook-associated protein FlgL	3	3	132	3	3	new#1	3	3	new#2	new#3	3	3	3	3	3	3	3	3	3
lmo0915	PTS sugar transporter subunit IIC	3	3	161	3	3	new#1	3	3	new#2	new#3	3	3	3	3	3	3	3	3	3
lmo0982		3	3	new#1	3	3	3	3	3	3	3	3	3	3	3	3	3	3	3	3
lmo1077	Glycosyl transferase	2	2	new#1	2	2	2	2	2	2	2	2	2	2	2	2	2	2	2	2
lmo1132	ABC transporter ATP-binding protein	3	3	new#1	3	3	new#2	18	18	new#3	new#4	3	3	3	3	3	3	3	3	3
lmo1161	ethanolamine utilization protein EutJ	2	2	new#1	2	2	2	2	2	2	2	2	2	2	2	2	2	2	2	2
lmo1252	hypothetical protein	2	2	new#1	2	2	new#2	2	2	new#3	new#4	2	2	2	2	2	2	2	2	2
lmo1486	hypothetical protein	3	3	new#1	3	3	new#2	3	3	new#3	new#4	3	3	3	3	3	3	3	3	67
lmo1499	murein endolytic transglycosylase MltG	new#2	new#2	new#1	new#2	new#2	new#3	new#2	new#2	new#4	new#5	new#2	new#2	new#2	new#2	new#2	new#2	new#2	new#2	new#2
lmo1566	isocitrate dehydrogenase	3	3	new#1	3	3	new#2	3	3	new#3	new#4	3	3	3	3	3	3	3	3	3
lmo1738		3	3	new#1	3	3	new#2	3	3	3	3	3	3	3	3	3	3	3	3	3
lmo1758	NAD-dependent DNA ligase LigA	3	3	new#1	3	3	new#3	3	3	new#4	new#5	3	new#2	3	3	3	208	208	208	3
lmo1943		new#6	new#6	new#1	new#1	new#1	new#3	new#1	new#1	new#4	new#5	new#1	new#2	new#1	new#1	new#1	new#1	new#1	new#1	new#1
lmo2165	Crp/Fnr family transcriptional regulator	3	3	new#1	3	3	new#3	3	3	new#2	new#4	3	new#2	3	3	3	3	3	3	3
lmo2179	peptidoglycan binding protein	3	3	new#1	new#3	3	new#4	3	3	new#2	new#5	3	new#2	249	3	3	3	3	3	3
lmo2185	hypothetical protein	2	2	273	2	2	new#2	2	2	new#1	new#3	2	new#1	2	2	2	2	2	2	2
lmo2186		2	2	new#1	2	2	2	2	2	2	2	2	2	2	2	2	2	2	2	2
lmo2370	aminotransferase	3	3	new#1	3	3	new#3	3	3	new#4	new#5	3	new#2	3	3	3	3	3	3	3
lmo2377	multidrug transporter	3	3	new#1	3	3	new#3	3	3	new#4	new#5	3	new#2	3	3	3	3	3	3	3
lmo2536		2	2	new#1	2	2	2	2	2	2	2	2	2	2	2	2	2	2	2	2
lmo2551		new#3	new#3	new#1	new#3	new#3	new#4	new#3	new#3	new#5	new#6	new#3	new#2	new#3	new#3	new#3	new#3	new#3	new#3	new#3
lmo2673	hypothetical protein	3	3	new#1	3	3	new#3	3	3	3	new#4	3	new#2	3	3	3	3	3	3	3
lmo2762	PTS cellbiose transporter subunit IIB	3	3	89	3	3	new#2	3	3	3	new#3	3	new#1	3	3	3	3	3	3	3
svpA		6	6	new#1	6	6	new#3	6	6	new#2	new#4	6	new#2	6	6	6	6	6	6	6
tetA_2		19	19	new#1	19	19	19	19	19	19	19	19	19	19	19	19	19	19	19	19
Plant B & C Specific Alleles
lmo0061	FtsK/SpoIIIE family protein, putative EssC/YukB component of Type VII secretion system	new#8	new#8	new#1	new#5	new#3	new#6	new#3	new#3	new#3	new#7	new#8	new#2	new#3	new#3	new#3	new#4	new#4	new#4	new#3
lmo2308		new#14	new#14	new#1	new#8	new#9	new#10	new#11	new#11	new#12	new#13	new#15	new#2	new#3	new#4	new#5	new#6	new#6	new#6	new#7

## Sheet: CC5
Supplemental Table 4. Alleles specific for each of the turkey processing Plants A-D and absent from strains of the same sequence types (STs) from other sources. The analysis involved whole genome MLST genome comparisons of FPE strains from Plants A-D and ST3, CC5, ST6, ST9 and ST321, following exclusion of incomplete or missing alleles from the genomes. Strain names are listed in row 3 and are co…
CC5
Locus	Product	#171D (A)	179b-3 (A)	201a-1 (A)	#210B (A)	232b-1 (A)	258a-1 (A)	34-4b (A)	34-2a (A)	L1619a-1 (B)	SK197 (C)	2011L-2858	CFSAN008100	INV971911	PNUSAL000800	PNUSAL002668	PNUSAL002860	PNUSAL003638
ST		5	5	5	5	5	5	5	5	552	5	5	5	5	5	5	5	5
Plant A Specific Alleles
hpt		43	43	43	43	43	43	43	43	14	83	14	14	83	14	83	14	14
lmo0283	ABC transporter permease	25	25	25	25	25	25	25	25	5	5	5	5	5	5	new#1	5	5
lmo0355	fumarate reductase subunit A	25	25	25	25	25	25	25	25	4	4	4	4	4	4	4	4	4
lmo0460		new#1	new#1	new#1	new#1	new#1	new#1	new#1	new#1	new#2	new#2	new#2	new#2	new#2	new#2	new#2	new#2	new#2
lmo0552		new#1	new#1	new#1	new#1	new#1	new#1	new#1	new#1	new#2	new#2	new#2	new#2	new#2	new#2	new#2	new#2	new#2
lmo0586		40	40	40	40	40	40	40	40	new#1	new#1	39	39	new#1	39	new#1	39	39
lmo0602	transcripitonal regulator	16	16	16	16	16	16	16	16	5	5	5	5	5	5	5	5	5
lmo0693	flagellar motor switch protein FliY	12	12	12	12	12	12	12	12	2	2	2	2	2	2	2	2	2
lmo0829	pyruvate-flavodoxin oxidoreductase	53	53	53	53	53	53	53	53	5	5	5	5	5	5	5	5	5
lmo0838	sugar:phosphate antiporter	39	39	39	39	39	39	39	39	5	50	5	5	50	5	50	5	5
lmo0839	tetracycline resistance protein	59	59	59	59	59	59	59	59	20	20	20	20	20	20	20	20	20
lmo0882	hypothetical protein	25	25	25	25	25	25	25	25	2	2	2	2	2	2	2	2	2
lmo0925		43	43	43	43	43	43	43	43	5	5	5	5	5	5	5	5	5
lmo1147	cobalamin biosynthesis protein CopB	24	24	24	24	24	24	24	24	3	3	3	3	new#1	3	3	3	3
lmo1231	DNA polymerase beta	40	40	40	40	40	40	40	40	5	5	5	5	5	5	5	5	5
lmo1291	acyltransferase	31	31	31	31	31	31	31	31	4	4	4	4	new#1	4	4	4	4
lmo1337	hypothetical protein	31	31	31	31	31	31	31	31	3	3	3	3	3	3	3	3	3
lmo1393	peptidase	30	30	30	30	30	30	30	30	5	5	5	5	5	5	5	5	5
lmo1655		new#1	new#1	new#1	new#1	new#1	new#1	new#1	new#1	new#2	new#2	new#2	new#2	new#2	new#2	new#2	new#2	new#2
lmo1718	hypothetical protein	29	29	29	29	29	29	29	29	5	5	158	5	5	5	5	5	5
lmo1831	orotate phosphoribosyltransferase	19	19	19	19	19	19	19	19	3	3	3	3	3	3	3	3	3
lmo1918	hypothetical protein	32	32	32	32	32	32	32	32	4	4	4	4	4	4	4	4	4
lmo2077	glycoprotease	19	19	19	19	19	19	19	19	2	2	2	2	2	2	2	2	2
lmo2138		new#1	new#1	new#1	new#1	new#1	new#1	new#1	new#1	new#2	new#2	new#2	new#2	new#2	new#2	new#2	new#2	new#2
lmo2268	ATP-dependent deoxyribonuclease subunit B	50	50	50	50	50	50	50	50	43	43	46	43	43	43	43	43	43
lmo2354		41	41	41	41	41	41	41	41	5	5	5	5	5	5	5	5	5
lmo2392	hypothetical protein	15	15	15	15	15	15	15	15	3	3	3	3	3	3	3	3	3
lmo2603	hypothetical protein	31	31	31	31	31	31	31	31	3	3	3	3	3	3	3	3	3
lmo2604		new#1	new#1	new#1	new#1	new#1	new#1	new#1	new#1	new#2	new#2	new#2	new#3	new#2	new#3	new#2	new#3	new#3
lmo2750		new#1	new#1	new#1	new#1	new#1	new#1	new#1	new#1	new#2	new#2	new#2	new#2	new#2	new#2	new#2	new#2	new#2
oatA	O-acetyltransferase	26	26	26	26	26	26	26	26	11	11	11	11	new#1	11	11	11	11
tetA_1		new#1	new#1	new#1	new#1	new#1	new#1	new#1	new#1	new#2	new#2	new#2	new#2	new#2	new#2	new#2	new#2	new#2
Plant B Specific Alleles
LMOf2365_2699		new#1	new#1	new#1	new#1	new#1	new#1	new#1	new#1	new#2	new#1	new#1	new#1	new#1	new#1	new#1	new#1	new#1
SSI1_lmo0446		2	2	2	2	2	2	2	2	new#1	2	2	2	2	2	2	2	2
bsh		33	33	33	33	33	33	33	33	12	33	33	33	33	33	33	33	33
cat	catalase	11	11	11	11	11	11	11	11	89	11	11	11	11	11	11	11	11
inlA		138	138	138	138	138	12	138	138	new#1	12	12	12	12	12	12	12	12
lmo0054	replicative DNA helicase	4	4	4	4	4	4	4	4	new#1	4	4	4	4	4	4	4	4
lmo0061	FtsK/SpoIIIE family protein, putative EssC/YukB component of Type VII secretion system	new#1	new#1	new#1	new#1	new#1	new#1	new#1	new#1	new#3	new#1	new#1	new#2	new#1	new#2	new#1	new#2	new#2
lmo0261		4	4	4	4	4	4	4	4	new#1	4	4	4	4	4	4	4	4
lmo0289	hypothetical protein	new#1	42	42	new#1	42	42	new#1	42	new#2	5	42	5	5	5	5	5	5
lmo0365		new#1	new#1	new#1	new#1	new#1	new#1	new#1	new#1	new#2	new#1	new#1	new#1	new#1	new#1	new#1	new#1	new#1
lmo0373		new#1	new#1	new#1	new#2	new#1	new#1	new#1	new#1	new#3	new#1	new#1	new#1	new#1	new#1	new#1	new#1	new#1
lmo0433		new#1	new#1	new#1	new#1	new#1	5	new#1	new#1	new#2	5	5	5	5	5	5	5	5
lmo0439		5	5	5	5	5	5	5	5	new#2	5	new#1	5	5	5	5	5	5
lmo0530	hypothetical protein	46	46	46	46	46	46	46	46	5	60	46	46	60	46	60	46	46
lmo0549		14	14	14	14	14	14	14	14	new#1	14	14	14	14	14	14	14	14
lmo0551		5	5	5	5	5	5	5	5	new#1	5	5	5	5	5	5	5	5
lmo0592	hypothetical protein	3	3	3	3	3	3	3	3	new#1	3	3	3	3	3	3	3	3
lmo0688	hypothetical protein	5	5	5	5	5	5	5	5	new#1	5	5	5	5	5	new#2	5	5
lmo0713	flagellar MS-ring protein FliF	5	5	5	5	5	5	5	5	new#1	5	5	5	5	5	5	5	5
lmo0768		new#1	new#2	new#2	new#1	new#2	new#2	new#1	new#2	new#3	new#2	new#2	new#2	new#2	new#2	new#2	new#2	new#2
lmo0842		new#1	new#1	new#1	new#1	new#3	new#4	new#1	new#1	new#5	new#2	new#1	new#1	new#2	new#1	new#2	new#6	new#1
lmo0901	PTS cellbiose transporter subunit IIC	5	5	5	5	5	5	5	5	new#1	5	5	5	5	5	5	5	5
lmo0945	competence protein ComEC	5	5	5	5	5	5	5	5	new#1	5	5	5	5	5	5	5	5
lmo1130		new#1	new#1	new#1	new#1	new#1	new#1	new#1	new#1	new#2	new#1	new#1	new#1	new#1	new#1	new#1	new#1	new#1
lmo1159		new#1	new#1	new#1	new#1	new#1	new#1	new#1	new#1	new#2	new#1	new#1	new#1	new#1	new#1	new#1	new#1	new#1
lmo1199	precorrin-3B C17-methyltransferase	2	2	2	2	2	2	2	2	5	2	2	2	2	2	2	2	2
lmo1330	30S ribosomal protein S15	2	2	2	2	2	2	2	2	3	2	2	2	2	2	2	2	2
lmo1415	hydroxy-3-methylglutaryl-CoA synthase	2	2	2	2	2	2	2	2	new#1	2	2	2	2	2	2	2	2
lmo1477		new#1	new#1	new#1	new#1	new#1	new#1	new#1	new#1	new#2	new#1	new#1	new#1	new#1	new#1	new#1	new#3	new#1
lmo1586	inorganic polyphosphate/ATP-NAD kinase	5	5	5	5	5	5	5	5	new#1	5	5	5	5	5	5	5	5
lmo1593		3	3	3	3	3	3	3	3	new#1	3	3	3	3	3	3	3	3
lmo1675	2-succinyl-5-enolpyruvyl-6-hydroxy-3- cyclohexene-1-carboxylate synthase	5	5	5	5	5	5	5	5	new#1	5	5	5	5	5	5	5	5
lmo1678	bifunctional homocysteine S-methyltransferase/5,10-methylenetetrahydrofolate reductase	5	5	5	5	5	5	5	5	new#1	55	5	49	55	49	55	49	49
lmo1781		new#1	new#1	new#1	new#1	new#1	new#1	new#1	new#1	new#2	new#1	new#1	new#1	new#1	new#1	new#1	new#1	new#1
lmo1947	two-component sensor histidine kinas	336	336	336	336	new#1	3	336	192	new#2	3	3	36	3	36	40	36	36
lmo2038		new#1	new#1	new#1	new#1	new#1	new#1	new#1	new#1	new#2	new#1	new#1	new#1	new#1	new#1	new#1	new#1	new#1
lmo2067	bile acid hydrolase	28	28	28	28	28	28	28	28	5	28	28	28	28	28	28	28	28
lmo2189	competence protein CoiA	3	3	3	3	3	3	3	3	new#1	3	79	3	3	3	3	3	3
lmo2196	hypothetical protein	2	2	2	2	2	2	2	2	209	2	2	2	2	2	2	2	2
lmo2225	fumarate hydratase	5	5	5	5	5	5	5	5	new#2	5	5	new#1	5	5	5	5	5
lmo2236	shikimate 5-dehydrogenase	2	2	2	2	2	2	2	2	new#1	2	2	31	2	31	2	31	31
lmo2267	ATP-dependent deoxyribonuclease subunit A	5	5	5	5	5	5	5	5	new#1	5	5	70	5	5	57	5	5
lmo2770	bifunctional glutamate--cysteine ligase/glutathione synthetase	5	5	5	5	5	5	5	5	new#1	5	5	45	5	45	5	45	45
lmo2816	MFS transporter	179	179	179	179	5	5	179	5	new#2	5	5	5	new#1	5	5	5	5
oppA		8	8	8	8	8	8	8	8	new#1	8	8	8	8	8	8	8	8
Plant C Specific Alleles
lmo0160		new#1	new#1	new#1	new#1	new#1	new#1	new#1	new#1	new#1	new#3	new#2	new#1	new#1	new#1	new#1	new#1	new#1
lmo0282	hypothetical protein	4	4	4	4	4	4	4	4	4	new#1	4	4	4	4	4	4	4
lmo0342		5	5	5	5	5	5	5	5	5	new#1	5	5	5	5	5	5	5
lmo0950		new#1	new#1	new#1	new#1	new#1	new#1	new#1	new#1	new#1	new#2	new#1	new#1	new#1	new#1	new#1	new#1	new#1
lmo1156	diol dehydratase-reactivating factor large subunit	5	5	5	5	5	5	5	5	5	new#1	5	5	5	5	5	5	5
lmo1217	endo-1,4-beta-glucanase and to aminopeptidase	4	4	4	4	4	4	4	4	4	new#1	4	4	4	4	4	4	4
lmo1375	aminotripeptidase	4	4	4	4	4	4	4	4	4	new#1	4	4	4	4	4	4	4
lmo1681	5-methyltetrahydropteroyltriglutamate-- homocysteine S-methyltransferase	2	2	2	2	2	2	2	2	2	new#1	2	2	2	2	2	2	2
lmo1765	bifunctional phosphoribosylaminoimidazolecarboxamide formyltransferase/IMP cyclohydrolase	4	4	4	4	4	4	4	4	4	new#1	4	4	4	4	4	4	4
lmo1767	phosphoribosylaminoimidazole synthetase	5	5	5	5	5	5	5	5	5	new#1	5	5	5	5	5	5	5
lmo2043		new#1	new#1	new#1	new#1	new#1	new#1	new#1	new#1	new#1	new#2	new#1	new#1	new#1	new#1	new#1	new#1	new#1
lmo2119	hypothetical protein	3	3	3	3	3	3	3	3	3	new#1	3	3	3	3	3	3	3
lmo2190	adaptor protein	3	3	3	3	3	3	3	3	3	new#1	3	3	3	3	3	3	3
lmo2768		new#1	new#1	new#1	new#1	new#1	new#1	new#1	new#1	new#1	new#2	new#1	new#1	new#1	new#1	new#1	new#1	new#1
mdtH_2		6	6	6	6	6	6	6	6	6	new#1	6	6	6	6	6	6	6
Plant A, B & C Specific Alleles
lmo0883	transmembrane protein	new#1	new#1	new#1	new#1	new#1	new#1	new#1	new#1	4	new#2	4	4	4	4	4	4	4

## Sheet: ST6
Supplemental Table 4. Alleles specific for each of the turkey processing Plants A-D and absent from strains of the same sequence types (STs) from other sources. The analysis involved whole genome MLST genome comparisons of FPE strains from Plants A-D and ST3, CC5, ST6, ST9 and ST321, following exclusion of incomplete or missing alleles from the genomes. Strain names are listed in row 3 and are co…
ST6
Locus	Product	34-2b (A)	34-6a (A)	L0226 (B)	L0315 (B)	L0603 (B)	L0704 (B)	L0719 (B)	SK2688 (C)	FSIS11704411	FSIS1504137	H7550	H7858	PNUSAL000294	PNUSAL000435	PNUSAL000868	PNUSAL001375	PNUSAL001525
Plant B Specific Alleles
lmo1226		6	6	64	64	64	64	64	6	6	6	6	6	6	6	6	6	6
lmo1257	hypothetical protein	2	2	21	21	21	21	21	2	2	2	2	2	2	2	2	2	2
lmo1291	acyltransferase	5	5	56	56	56	56	56	5	5	5	5	X	5	5	5	5	5
lmo1293	glycerol-3-phosphate dehydrogenase	6	6	69	69	69	69	69	6	6	6	6	6	6	6	6	6	6
lmo1369	phosphotransbutyrylase	3	3	42	42	42	42	42	3	3	3	3	3	3	3	3	3	3
lmo1875	ABC transporter ATP-binding protein	6	6	76	76	76	76	76	6	6	6	6	6	6	6	6	6	6
lmo2271		new#2	new#3	new#5	new#5	new#5	new#5	new#5	new#1	new#4	new#4	new#4	new#4	X	X	new#6	new#6	new#1
lmo2321		new#2	new#3	new#6	new#6	new#6	new#6	new#6	new#1	new#4	new#5	new#5	new#4	X	X	new#7	new#7	new#1
lmo2444		new#1	new#1	new#2	new#2	new#2	new#2	new#2	new#1	new#1	new#1	new#1	new#1	new#3	new#3	new#1	new#1	new#1
lmo2581	hypothetical protein	2	2	57	57	57	57	57	2	2	2	2	2	2	2	2	2	2
lmo2717	cytochrome D ubiquinol oxidase subunit II	2	2	136	136	136	136	136	2	2	2	2	2	2	2	2	2	new#1
macB_4		1	1	new#1	new#1	new#1	new#1	new#1	1	1	1	1	1	1	1	1	1	1
mdtH_1		13	13	2	2	2	2	2	13	13	13	13	I	13	13	new#1	new#1	13
oatA	O-acetyltransferase	6	6	31	31	31	31	31	6	6	6	6	X	6	6	6	6	6
Plant C Specific Alleles
inlF		7	7	7	7	7	7	7	new#1	7	7	7	7	65	65	7	7	new#2
lmo0300	phospho-beta-galactosidase	6	6	6	6	6	6	6	398	67	67	67	67	6	6	6	6	6
lmo0600		3	3	3	3	3	3	3	new#1	3	3	3	3	3	3	3	3	3
lmo0717	transglycosylase	5	5	5	5	5	5	5	213	5	5	5	5	5	5	5	5	5
lmo0844	hypothetical protein	2	2	2	2	2	2	2	137	2	2	2	2	2	2	2	2	2
lmo1222	phenylalanyl-tRNA synthetase subunit beta	6	6	6	6	6	6	6	466	6	6	6	6	6	6	6	6	6
lmo1295	RNA-binding protein Hfq	2	2	2	2	2	2	2	54	2	2	2	2	2	2	2	2	2
lmo1499	murein endolytic transglycosylase MltG	new#2	new#2	new#2	new#2	new#2	new#2	new#2	new#1	new#2	new#2	new#2	new#2	new#2	new#2	new#2	new#2	new#2
lmo1522		new#2	new#2	new#2	new#2	new#2	new#2	new#2	new#1	new#2	new#2	new#2	new#2	new#2	new#2	new#2	new#2	new#2
lmo1574		new#2	new#2	new#2	new#2	new#2	new#2	new#2	new#1	new#2	new#2	new#2	new#2	new#2	new#2	new#2	new#2	new#2
lmo1622		2	2	2	2	2	2	2	new#1	2	2	2	2	2	2	2	2	2
lmo2106	hypothetical protein	3	3	3	3	3	3	3	32	3	3	3	3	3	3	3	3	3
lmo2145	hypothetical protein	2	2	2	2	2	2	2	220	2	2	2	2	2	2	2	2	2
lmo2172	propionate CoA-transferase	6	6	6	6	6	6	6	309	6	6	6	6	6	6	6	6	6
lmo2324		new#2	new#3	new#5	new#5	new#5	new#5	new#5	new#1	new#4	new#5	new#5	new#4	X	X	new#6	new#6	new#7
lmo2349	amino acid ABC transporter substrate-binding protein	5	5	5	5	5	5	5	175	5	5	5	5	5	5	5	5	5
lmo2745	ABC transporter ATP-binding protein	6	6	6	6	6	6	6	257	6	new#1	6	6	6	6	6	6	6
lmo2843		new#2	new#2	new#2	new#2	new#2	new#2	new#2	new#1	new#2	new#2	new#2	new#2	new#2	new#2	new#2	new#2	new#2
Plant B & C Specific Alleles
lmo2306	Bacteriophage A118-like protein	new#2	new#3	new#5	new#5	new#5	new#5	new#5	new#1	X	new#4	new#4	X	X	X	new#6	new#6	X
lmo2307	Bacteriophage A118-like protein	new#2	new#3	new#5	new#5	new#5	new#5	new#5	new#1	X	new#4	new#4	X	X	X	new#6	new#6	X
lmo2323	gp43 [Bacteriophage A118]	new#2	new#3	new#5	new#5	new#5	new#5	new#5	new#1	new#4	new#4	new#4	new#4	X	X	new#6	new#6	new#7

## Sheet: ST9
Supplemental Table 4. Alleles specific for each of the turkey processing Plants A-D and absent from strains of the same sequence types (STs) from other sources. The analysis involved whole genome MLST genome comparisons of FPE strains from Plants A-D and ST3, CC5, ST6, ST9 and ST321, following exclusion of incomplete or missing alleles from the genomes. Strain names are listed in row 3 and are co…
ST9
Locus	Product	283a-3 (A)	516b-1 (A)	SK130 (C)	FSIS21821253	J2315	PNUSAL000111	PNUSAL000190	PNUSAL000306	PNUSAL000314	PNUSAL001470	PNUSAL002039	PNUSAL002076	CFSAN061407
Plant C Specific Alleles
lmo0267		8	8	new#1	8	8	8	8	8	8	8	8	8	8
lmo0542	PTS sorbitol transporter subunit IIA	1	1	13	1	1	1	1	1	1	1	1	1	1
lmo0585	secreted protein	1	1	new#1	1	1	1	1	1	1	1	1	1	1
lmo0829	pyruvate-flavodoxin oxidoreductase	1	1	new#1	1	1	1	1	1	1	1	1	1	243
lmo1011	tetrahydrodipicolinate succinylase	1	1	new#1	1	1	1	1	1	1	1	1	1	1
lmo1574		1	1	new#1	1	1	new#2	1	new#2	1	1	1	1	1
lmo2370	aminotransferase	1	1	183	1	1	1	1	1	1	1	1	1	1
lmo2657	deoxyguanosinetriphosphate triphosphohydrolase	31	31	201	31	31	31	31	31	31	31	31	31	31
lmo2787		1	1	new#1	1	1	1	1	1	1	1	1	1	1

## Sheet: ST321
Supplemental Table 4. Alleles specific for each of the turkey processing Plants A-D and absent from strains of the same sequence types (STs) from other sources. The analysis involved whole genome MLST genome comparisons of FPE strains from Plants A-D and ST3, CC5, ST6, ST9 and ST321, following exclusion of incomplete or missing alleles from the genomes. Strain names are listed in row 3 and are co…
ST321
Locus	Product	176b-1 (A)	206a-5 (A)	210b-1 (A)	339b-5 (A)	494b-1 (A)	L1624a (B)	FSL N1-0053 (S)	FSL N1-0110 (S)	FSL N1-0254 (S)	FSL R9-4443 (S)	FSL T1-0027 (S)	FSL T1-0077 (S)	CFS044	FSIS1505351	FSIS1505351	FSIS1608270	FSIS1701356	PNUSAL001133	PNUSAL002859	SKB690
Plant A Specific Alleles
LMRG_01558		8	8	8	8	8	20	20	20	new#2	20	new#1	20	new#1	X	X	58	58	new#2	new#2	X
Plant B Specific Alleles
lmo0013		1	1	1	1	1	new#2	1	1	1	1	1	new#1	1	1	1	1	1	1	1	1
lmo0028		1	1	1	1	1	new#1	1	1	1	1	1	1	1	1	1	1	1	1	1	1
lmo0135	peptide ABC transporter substrate-binding protein	42	42	42	42	42	new#1	new#1	42	42	42	42	42	42	42	42	42	42	42	42	new#2
lmo1084		15	15	15	15	15	new#1	15	15	15	15	15	15	15	15	15	15	15	15	15	15
lmo1499	murein endolytic transglycosylase MltG	1	1	1	1	1	new#1	1	1	1	I	1	1	1	1	1	1	1	1	1	1
lmo1711	aminopeptidase	11	11	11	11	11	new#1	11	11	11	11	11	11	11	11	11	11	11	11	11	11
lmo2032		18	18	18	18	18	new#1	18	18	18	18	18	18	18	18	18	18	18	18	18	18
